# Supplementary material for: Increased PD-L1 surface expression on peripheral blood granulocytes and monocytes after vaccination with SARS-CoV2 mRNA or vector vaccine
Source: publisher site journal article supplement (doi:10.1515/cclm-2022-0787), 2022-10-17
Supplement: Supplementary file 1 [file j_cclm-2022-0787_suppl_001.docx]

**Supplement material:**

**Supplemental Fig. 1:** **PD-L1 delta-MFI surface expression on Granulocytes (Gran) and Monocytes (Mono) of three different SARS-CoV2 vaccine combinations (AZ/AZ n=23, AZ/BNT n=24, BNT/BNT n=15).** A Kruskal Wallis test was performed for statistical analysis. Delta-MFI on granulocytes and monocytes do not differ significantly between the three vaccine combinations.

**Supplemental Fig. 2:** **Regression / correlation analysis between SARS-CoV2 Anti-S IgG antibodies on day 10 and PD-L1 delta-MFI surface expression on A) Granulocytes and B) Monocytes of SARS-CoV-2 vaccinated individuals** (n=55). Correlation coefficients were calculated using the Spearman rank method. The slightly different number of subjects between the figures is due to the lack of isolated results for certain subjects.

**Supplemental Fig. 3:** **Regression / correlation analysis between SARS-CoV2 specific induced Interferon (IFN)-γ represented by stimulation index and PD-L1 delta-MFI surface expression on A) Granulocytes and B) Monocytes of all SARS-CoV2 vaccinated individuals** (n=53). Correlation coefficients were calculated using the Spearman rank method. The slightly different number of subjects between the figures is due to the lack of isolated results for certain subjects.
